# Supplementary material for: Hydrazinobenzoylcurcumin inhibits androgen receptor activity and growth of castration-resistant prostate cancer in mice
Source: PubMed Central journal article supplement (PMC4467427; doi:10.18632/oncotarget.3346), 2015-01-31
Supplement: oncotarget-06-6136-s001.pdf [file oncotarget-06-6136-s001.pdf]

# Hydrazinobenzoylcurcumin inhibits androgen receptor activity and growth of castration-resistant prostate cancer in mice

## Supplementary Materials and Methods

### Pharmacokinetics and tissue distribution of HBC:

**RNA-Seq data analysis:** The output for the RNA-Seq data used for the statistical analysis was the reads per kilobase per million mapped reads (RPKM). To ensure that the selected transcripts represent substantive changes, we selected only those where the enriched sample had a greater expression than the hormone-deprived cell sample. Since the distribution of RPKM was skewed, the analysis used the log of the [RPKM measurement plus 1] as the analysis metric. The test statistic employed was the difference in RPKM between the R1881-stimulated (R1881) sample and the R1881-stimulated in the presence of HBC (R1881 + HBC) sample, which because of the log transformation is equivalent to a log-fold change. A multiple testing correction was employed to minimize the false discovery rate (FDR). Assuming that only 2% of the transcripts are differentially expressed, we computed the nominal statistical threshold (0.0018) to achieve 10% FDR. A permutation technique was employed to determine the transcripts that were differentially expressed between the 2 conditions. Briefly, we shuffled the labels of the 4 samples measured (viz., exponentially growing (control), hormone-deprived (CSS treated), R1881-stimulated, and R1881 + HBC treated) creating a mock androgen-deprived, R1881-stimulated and R1881+ HBC sample to generate log-fold change values following the same algorithm used for the actual data analysis. All possible permutations were done to create a null distribution for log-fold change. A p-value was then computed for each transcript by comparing the observed log-fold change to the permutation-generated null distribution.

**Measurement of HBC levels in plasma and tissues:** The blood samples were centrifuged at 3000 rpm, at 4°C for 10 min, and plasma was collected immediately after the centrifugation and stored at -80°C until analysis. The tissue samples were washed free of blood with 0.9% saline, blotted dry, weighed, and stored at -80°C until analysis. HBC in mouse plasma and tissue samples were determined

using a high-performance liquid chromatography coupled with tandem mass spectrometry (LC-MS/MS) method as described below. The tissue samples were homogenized in 4 volumes of human plasma. A 250  $\mu$ l aliquot of tissue homogenate or mouse plasma was spiked with 1 ml ethyl acetate. The mixture was vortex-mixed, centrifuged at 14,000 rpm for 5 min, and the top layer was transferred and evaporated to dryness under a stream of nitrogen in a water bath at  $50^{\circ}\text{C} \pm 5^{\circ}\text{C}$ . The residue was reconstituted in 100  $\mu$ l of methanol/water containing 0.45% formic acid (70:30, v/v), and centrifuged at 14,000 rpm for 5 min. Ten microliters of the supernatant was injected into the LC-MS/MS. The chromatographic separation was achieved on a Waters XTerra MS column ( $2.1 \times 50$  mm, 3.5  $\mu$ m i.d.) with a mobile phase consisting of methanol/water containing 0.45% formic acid (70:30, v/v) at a flow rate of 0.2 ml/min. The column effluent was monitored using a Waters Quattro Micro<sup>TM</sup> triple quadrupole mass-spectrometric detector equipped with electrospray ionization source (Milford, MA, USA). HBC was monitored in the positive ionization mode at the mass transition of 485.3 $\rightarrow$ 469.4. The calibration curve was constructed in human plasma over the concentration range of 2 to 10,000 ng/ml. The within- and between-day precision and accuracy of the assay were <15%.

**Pharmacokinetic data analysis:** The plasma and tissue pharmacokinetic parameters of HBC were estimated using noncompartmental analysis with the WinNonlin software (Pharsight). The maximum concentration ( $C_{\text{max}}$ ) and the time of occurrence for maximum concentration ( $T_{\text{max}}$ ) were obtained by visual inspection of the plasma/tissue concentration-time curves after the drug administration. The total area under the concentration-time curve from time zero to the last measurable time point ( $\text{AUC}_{\text{last}}$ ) was calculated using the linear and logarithmic trapezoidal method for the ascending and descending plasma concentrations, respectively. The total area under the concentration-time curve from time zero to infinity ( $\text{AUC}_{0-\infty}$ ) was calculated as the sum of  $\text{AUC}_{\text{last}}$  and the extrapolated area, which was calculated by the last observed concentration divided by the terminal rate constant ( $\lambda_z$ ), where  $\lambda_z$  was estimated by terminal log-linear phase of the concentration-time curve. The terminal elimination half-life

( $T_{1/2}$ ) was calculated as  $0.693/\lambda_z$ . The apparent systemic clearance (CL/F) was calculated as  $\text{Dose}/\text{AUC}_{0-\infty}$ . The apparent volume of distribution ( $V_z/F$ ) was estimated as  $(\text{CL}/F)/\lambda_z$ .

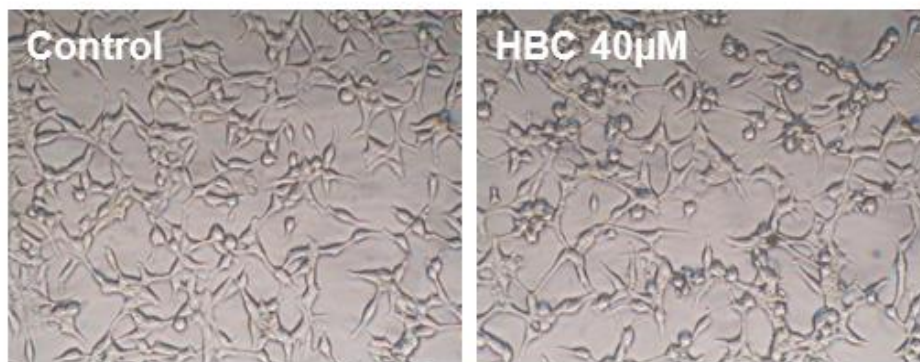

**Figure S1: Effect of HBC on morphology of LNCaP cells:** Exponentially growing LNCaP cells were treated with vehicle (0.01% DMSO, control) or 40  $\mu\text{M}$  HBC for 24 hours and phase contrast images were captured using Zeiss Invertoscope 40C microscope.

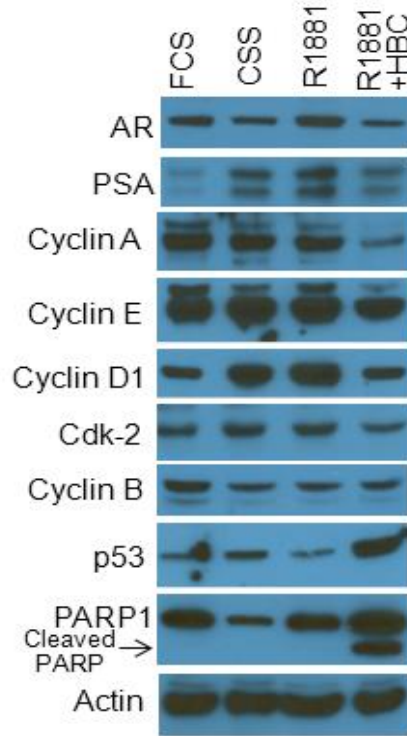

**Figure S2: Effect of HBC on androgen-regulated expression of cell cycle proteins in LNCaP cells.** Exponentially growing (FCS) LNCaP cells deprived for androgen (CSS) were treated with R1881 (2 nM) in the absence (R1881) or presence of NaHBC (40  $\mu$ M) (R1881+HBC) for 24 hours. Cell extracts were prepared and Western blotting performed as described in Materials and Methods.

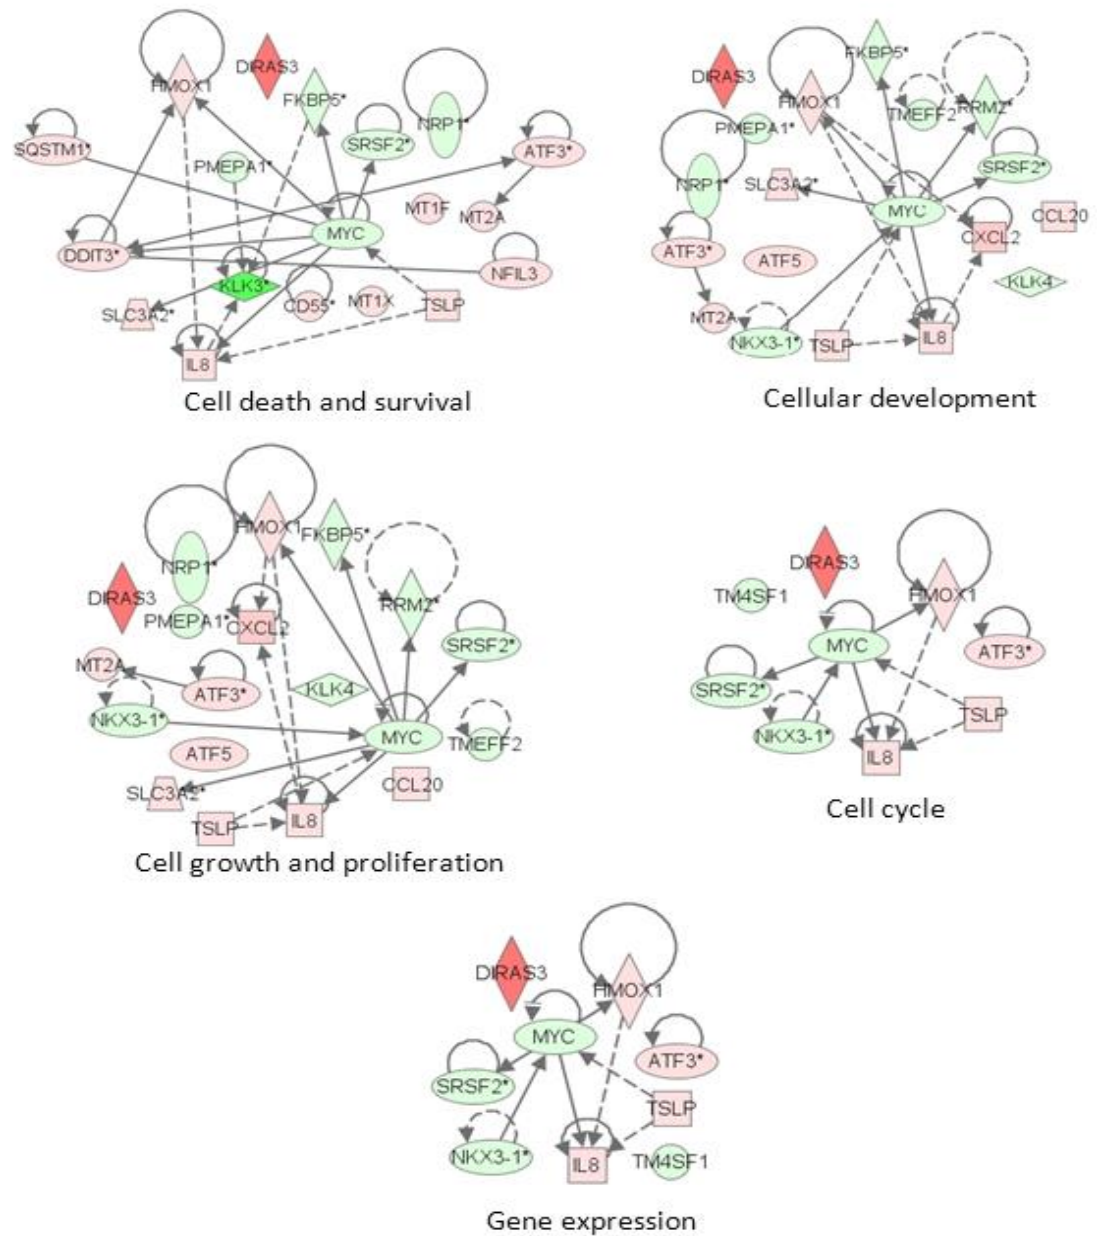

**Figure S3: Identification of network interactions between HBC affected genes.** IPA based biological interaction network between HBC affected genes ( $p < 0.002$ ) within the five functional categories in Table 2.

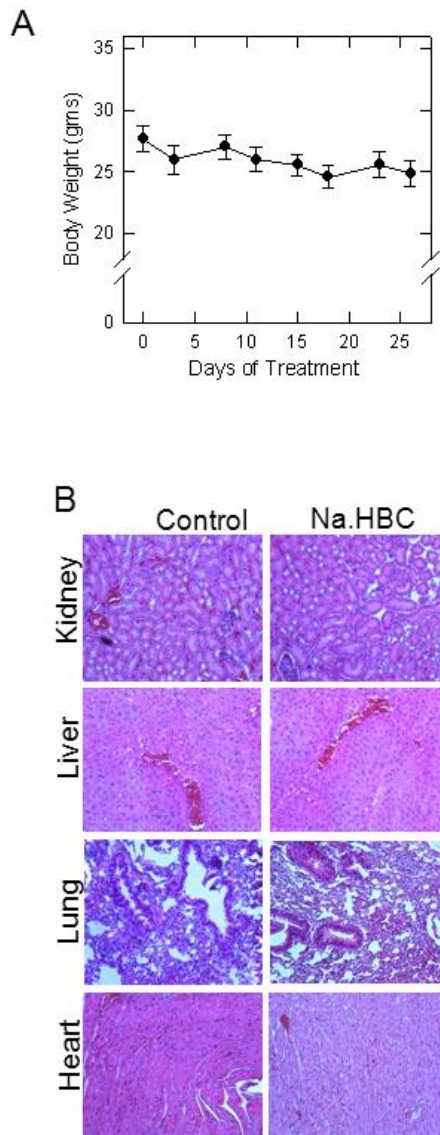

**Figure S4: A) Body weight of mice is unaffected by HBC.** Nude mice bearing C4-2B tumors were given a daily (5 days/week) i.p. injection of 100 mg/Kg and body weight was measured twice a week. Data points, mean body weight (n=5); bars, SE. B) HBC has no noticeable effect on histology of major organs, viz., kidney, liver, lung and heart. Paraffin-embedded tissue sections were deparaffinized, hydrated, and stained with hematoxylin for 1 min. After rinsing, the slides were stained with eosin for 1 min, rinsed thoroughly, and mounted with Permount.

**Table S1: PCR primer Sequences**

| Genes   | Primer Sequences                |                               |
|---------|---------------------------------|-------------------------------|
|         | Forward                         | Reverse                       |
| PSA     | 5'-gcacccggagagctgtgt-3'        | 5'-gatcacgctttgttcctgat-3'    |
| NKX3-1  | 5'-ccgcagaagcgctcccagct-3'      | 5'-cgaggagagctgcttcgctt-3'    |
| CAMKK2  | 5'-gcagtgacgcgtcctctcaa-3'      | 5'-tccgctcgtccatgaatgggca-3'  |
| FKBP5   | 5'-aaatccaaacgaaggagcaa-3'      | 5'-gccacatctctgcagtcaaa-3'    |
| TMPRSS2 | 5'-ccatttgaggatccgtctg-3'       | 5'-ggatgtgtcttggggagcaa-3'    |
| MYC     | 5'-tgaggagacaccgccac-3'         | 5'-caacatcgatttcttctc-3'      |
| APLN    | 5'- ccagagggtcaaggaatgggc-3'    | 5'- ataaccgccgggggtgggca-3'   |
| OR51E1  | 5'-acacattcctccatacggttga-3'    | 5'-tagcactggattcattgccatt-3'  |
| MCCC2   | 5'-gctcgtatctcagtgtgggag-3'     | 5'- aaagccgcttcacagcactgg-3'  |
| TM4SF1  | 5'-agcaccgagggccagtacctt-3'     | 5'-ccaccaagagccaagaggatag-3'  |
| TM4SF2  | 5'-aagtgtatgttgggagtgttcgagt-3' | 5'-gagctttgaccccatctatcagc-3' |
| ATF3    | 5'-aggatgctctgctgttcct-3'       | 5'-gacaaagggcgtcaggttag-3'    |
| DDIT3   | 5'-ccttcagtgacttccatgac-3'      | 5'-tcaccatacagcagcctgag-3'    |
| SQSTM1  | 5'-atcgaggatccgagtgt-3'         | 5'-tggctgtgagctgctctt-3'      |
| GAPDH   | 5'-gagatccctccaaatcaagtg-3'     | 5'-ccttcacgataccaaagtgt-3'    |

**Table S2****References of datasets\* used for Oncomine analysis**

| # | Study Samples                                              | Genes |     |
|---|------------------------------------------------------------|-------|-----|
| 1 | Prostate Carcinoma vs. Normal (Grasso Prostate)            | 19189 | 122 |
| 2 | Prostate Carcinoma vs. Normal (Holzbeierlein Prostate)     | 8603  | 54  |
| 3 | Prostate Carcinoma vs. Normal (Lapointe Prostate)          | 10166 | 112 |
| 4 | Prostate Carcinoma vs. Normal (Liu Prostate)               | 12624 | 57  |
| 5 | Prostate Carcinoma vs. Normal (Liu Prostate 2)             | 18823 | 74  |
| 6 | Prostate Carcinoma vs. Normal (Singh Prostate)             | 8603  | 102 |
| 7 | Prostate Carcinoma vs. Normal (Taylor Prostate 3)          | 22238 | 185 |
| 8 | Prostate Carcinoma Epithelia vs. Normal (Tomlins Prostate) | 10656 | 101 |
| 9 | Prostate Carcinoma vs. Normal (Yu Prostate)                | 8603  | 112 |

\*, See Oncomine for details on each of the references



**Table S3: AR- and CaM-regulated genes affected by HBC**

**1. AR regulated:**

| Gene symbol | Fold Change | p-value  | Location            | Family                            | Entrez Gene ID |
|-------------|-------------|----------|---------------------|-----------------------------------|----------------|
| ABCC4       | -3.43524    | 0.005301 | Plasma Membrane     | transporter                       | 10257          |
| AMD1        | -3.07523    | 0.006688 | Cytoplasm           | enzyme                            | 262            |
| AR          | -2.0181     | 0.040947 | Nucleus             | ligand-dependent nuclear receptor | 367            |
| ATAD2       | -1.97381    | 0.034138 | Nucleus             | other                             | 29028          |
| ATF3        | 27.28272    | 0.001173 | Nucleus             | transcription regulator           | 467            |
| AURKA       | 3.156553    | 0.049307 | Nucleus             | kinase                            | 6790           |
| AZGP1       | -4.70213    | 0.0073   | Extracellular Space | transporter                       | 563            |
| CALM3       | -1.93919    | 0.029509 | Cytoplasm           | other                             | 801 805 808    |
| CAST        | 13.11909    | 0.002411 | Cytoplasm           | peptidase                         | 831            |
| CBX1        | 4.312353    | 0.031093 | Nucleus             | transcription regulator           | 10951          |
| CCND1       | -3.88995    | 0.004729 | Nucleus             | other                             | 595            |
| CDKN1A      | 6.142206    | 0.008664 | Nucleus             | kinase                            | 1026           |
| CEBPB       | 9.455696    | 0.002247 | Nucleus             | transcription regulator           | 1051           |
| DCTPP1      | -2.0218     | 0.026864 | Cytoplasm           | enzyme                            | 79077          |
| DHCR24      | -2.05032    | 0.023632 | Cytoplasm           | enzyme                            | 1718           |
| E2F1        | -2.12171    | 0.033803 | Nucleus             | transcription regulator           | 1869           |
| ERBB2       | -2.16612    | 0.029309 | Plasma Membrane     | kinase                            | 2064           |
| ERBB3       | -2.17684    | 0.021308 | Plasma Membrane     | kinase                            | 2065           |
| ETV1        | -4.4852     | 0.008121 | Nucleus             | transcription regulator           | 2115           |
| ETV5        | 28.28571    | 0.008033 | Nucleus             | transcription regulator           | 2119           |
| FAM174B     | -1.76938    | 0.04499  | unknown             | other                             | 400451         |
| FEN1        | -1.96053    | 0.036072 | Nucleus             | enzyme                            | 2237           |
| FKBP5       | -9.83154    | 0.048427 | Nucleus             | enzyme                            | 2289           |
| GDF15       | 3.950328    | 0.010906 | Extracellular Space | growth factor                     | 9518           |
| HMGB2       | 2.968137    | 0.029806 | Nucleus             | transcription regulator           | 3148           |
| HSPA5       | 7.059296    | 0.002515 | Cytoplasm           | enzyme                            | 3309           |
| IGF1R       | -3.15068    | 0.018056 | Plasma Membrane     | transmembrane receptor            | 3480           |

|        |          |          |                     |                         |        |
|--------|----------|----------|---------------------|-------------------------|--------|
| IGFBP3 | 4.085242 | 0.03593  | Extracellular Space | other                   | 3486   |
| IL1R1  | -2.07322 | 0.037355 | Plasma Membrane     | transmembrane receptor  | 3554   |
| JMJD1C | 2.896672 | 0.038943 | Nucleus             | other                   | 221037 |
| KAT2B  | 7.284722 | 0.007536 | Nucleus             | transcription regulator | 8850   |
| KLK2   | -56.9825 | 0.00257  | Extracellular Space | peptidase               | 3817   |
| KLK3   | -74.0917 | 0.001232 | Extracellular Space | peptidase               | 354    |
| KRT14  | -33.5    | 0.022701 | Cytoplasm           | other                   | 3861   |
| LMNB1  | -1.74796 | 0.048602 | Nucleus             | other                   | 4001   |
| MAOA   | -2.04466 | 0.027495 | Cytoplasm           | enzyme                  | 4128   |
| MCM2   | -2.68073 | 0.023272 | Nucleus             | enzyme                  | 4171   |
| MCM4   | -2.45869 | 0.020616 | Nucleus             | enzyme                  | 4173   |
| MDM2   | 4.315856 | 0.009778 | Nucleus             | transcription regulator | 4193   |
| MME    | -3.0324  | 0.009679 | Plasma Membrane     | peptidase               | 4311   |
| MRAS   | 6.021782 | 0.037789 | Plasma Membrane     | enzyme                  | 22808  |
| MSMB   | -10.6667 | 0.013061 | Extracellular Space | other                   | 4477   |
| MTA2   | -1.7182  | 0.049068 | Nucleus             | transcription regulator | 9219   |
| NCOR1  | 6.776781 | 0.036596 | Nucleus             | transcription regulator | 9611   |
| NDRG1  | -3.16775 | 0.007776 | Nucleus             | kinase                  | 10397  |
| NKX3-1 | -6.74093 | 0.000932 | Nucleus             | transcription regulator | 4824   |
| PA2G4  | -1.79202 | 0.041533 | Nucleus             | transcription regulator | 5036   |
| PARK7  | -1.75168 | 0.043412 | Nucleus             | enzyme                  | 11315  |
| PGC    | -34.2683 | 0.001112 | Extracellular Space | peptidase               | 5225   |
| PIK3R1 | -4.3684  | 0.010015 | Cytoplasm           | kinase                  | 5295   |
| PMEPA1 | -14.8923 | 0.001743 | Plasma Membrane     | other                   | 56937  |
| PRKCD  | -2.97236 | 0.0101   | Cytoplasm           | kinase                  | 5580   |
| REPS2  | -4.61923 | 0.037039 | Cytoplasm           | other                   | 9185   |
| RHOB   | -3.60805 | 0.004875 | Cytoplasm           | enzyme                  | 388    |
| RNF6   | 3.528591 | 0.04032  | Nucleus             | transcription regulator | 6049   |
| RRM2   | -6.91357 | 0.04745  | Nucleus             | enzyme                  | 6241   |
| RUVBL1 | -1.7284  | 0.046779 | Nucleus             | transcription regulator | 8607   |
| SETD7  | 2.721632 | 0.039718 | Nucleus             | enzyme                  | 80854  |
| SHBG   | 557406.7 | 0.016459 | Extracellular       | other                   | 6462   |

|         |          |          |                        |                            |        |
|---------|----------|----------|------------------------|----------------------------|--------|
|         |          |          | Space                  |                            |        |
| SHC1    | -5.12115 | 0.00264  | Cytoplasm              | kinase                     | 6464   |
| SIRT1   | 3.87951  | 0.026515 | Nucleus                | transcription<br>regulator | 23411  |
| SLC45A3 | -8.76129 | 0.000741 | Cytoplasm              | other                      | 85414  |
| SMAD1   | 5.112759 | 0.006875 | Nucleus                | transcription<br>regulator | 4086   |
| SMARCA4 | -2.08567 | 0.036198 | Nucleus                | transcription<br>regulator | 6597   |
| SNAI2   | -2.70769 | 0.022235 | Nucleus                | transcription<br>regulator | 6591   |
| SPDEF   | -11.006  | 0.006618 | Nucleus                | transcription<br>regulator | 25803  |
| SREBF1  | -2.17593 | 0.026894 | Nucleus                | transcription<br>regulator | 6720   |
| SVIL    | 3.610888 | 0.025774 | unknown                | other                      | 6840   |
| TACC2   | 2.999196 | 0.030835 | Nucleus                | other                      | 10579  |
| TARP    | -20.1111 | 0.000486 | Cytoplasm              | other                      | 445347 |
| TGIF1   | -2.8032  | 0.03252  | Nucleus                | transcription<br>regulator | 7050   |
| TH1L    | -1.90953 | 0.033151 | Nucleus                | other                      | 51497  |
| TMPRSS2 | -17.539  | 0.000165 | Plasma<br>Membrane     | peptidase                  | 7113   |
| TNFAIP2 | -9.35714 | 0.049139 | Extracellular<br>Space | other                      | 7127   |
| TPD52   | -2.17987 | 0.021393 | Cytoplasm              | other                      | 7163   |
| TRIM68  | -3.3842  | 0.005767 | Cytoplasm              | enzyme                     | 55128  |
| TUBB3   | -3.05966 | 0.014534 | Cytoplasm              | other                      | 10381  |
| UBE2L3  | -3.56751 | 0.043262 | Nucleus                | enzyme                     | 7332   |
| VEGFA   | 6.80086  | 0.031879 | Extracellular<br>Space | growth factor              | 7422   |
| VIM     | -1.85232 | 0.035892 | Cytoplasm              | other                      | 7431   |
| ZBTB1   | 10.35934 | 0.046812 | Nucleus                | other                      | 22890  |
| ZBTB16  | -2.74396 | 0.016483 | Nucleus                | transcription<br>regulator | 7704   |
| ZMIZ1   | -2.2314  | 0.025867 | Nucleus                | other                      | 57178  |
| ZWINT   | 22.1916  | 0.005359 | Nucleus                | other                      | 11130  |

## 2. CaM regulated genes:

| Gene symbol | Fold Change | p-value  | Location           | Family                           | Entrez Gene ID |
|-------------|-------------|----------|--------------------|----------------------------------|----------------|
| VIPR1       | -7.62432    | 0.011869 | Plasma<br>Membrane | G-protein<br>coupled<br>receptor | 7433           |
| AURKB       | -7.38378    | 0.01764  | Nucleus            | kinase                           | 9212           |
| GRB7        | -7.05055    | 0.024123 | Plasma<br>Membrane | other                            | 2886           |

|        |          |          |                 |                         |       |
|--------|----------|----------|-----------------|-------------------------|-------|
| KCNN2  | -3.40592 | 0.011498 | Plasma Membrane | ion channel             | 3781  |
| RAB3B  | -3.12983 | 0.009183 | Cytoplasm       | enzyme                  | 5865  |
| CALD1  | -3.01892 | 0.01989  | Cytoplasm       | other                   | 800   |
| SYNE2  | -2.82813 | 0.025406 | Nucleus         | other                   | 23224 |
| GRK1   | -2.5443  | 0.039053 | Plasma Membrane | kinase                  | 6011  |
| RDX    | 2.731957 | 0.045793 | Cytoplasm       | other                   | 5962  |
| NOL7   | 2.789189 | 0.04202  | Nucleus         | other                   | 51406 |
| INVS   | 3.468545 | 0.037059 | Nucleus         | transcription regulator | 27130 |
| GCLM   | 3.680431 | 0.017602 | Cytoplasm       | enzyme                  | 2730  |
| DDX21  | 5.358563 | 0.009728 | Nucleus         | enzyme                  | 9188  |
| HMMR   | 5.565636 | 0.014272 | Plasma Membrane | transmembrane receptor  | 3161  |
| LYST   | 5.578199 | 0.030452 | Cytoplasm       | transporter             | 1130  |
| OPTN   | 7.290033 | 0.03855  | Cytoplasm       | other                   | 10133 |
| DOCK3  | 7.913043 | 0.006969 | Cytoplasm       | other                   | 1795  |
| SQSTM1 | 21.29912 | 0.000373 | Cytoplasm       | transcription regulator | 8878  |

### 3. Both AR and CaM Regulated:

| Gene symbol | Fold Change | p-value  | Location  | Family                  | Entrez Gene ID |
|-------------|-------------|----------|-----------|-------------------------|----------------|
| MYC         | -10.5381    | 0.000521 | Nucleus   | transcription regulator | 4609           |
| CAMKK2      | -6.44435    | 0.001528 | Cytoplasm | kinase                  | 10645          |
| FLNA        | -2.82055    | 0.010411 | Cytoplasm | other                   | 2316           |
| AKT1        | -2.58702    | 0.018873 | Cytoplasm | kinase                  | 207            |
| DCAF6       | -3.0237     | 0.031518 | Nucleus   | transcription regulator | 55827          |
| CCNE1       | -2.27632    | 0.032305 | Nucleus   | transcription regulator | 898            |

**Table S4: Plasma and tissue pharmacokinetic parameters<sup>a</sup> of HBC**

|                                                              | <b>Plasma</b> | <b>Tumor</b> | <b>Liver</b> | <b>Pancreas</b> | <b>Spleen</b> |
|--------------------------------------------------------------|---------------|--------------|--------------|-----------------|---------------|
| T <sub>max</sub> (h)                                         | 1.00          | 0.50         | 0.50         | 1.00            | 1.00          |
| C <sub>max</sub> (µg/mL for plasma, µg/g for tissues)        | 16.44         | 12.64        | 58.11        | 68.28           | 52.19         |
| AUC <sub>last</sub> (h*µg/mL for plasma, h*µg/g for Tissues) | 18.34         | 10.35        | 42.97        | 66.69           | 49.06         |
| AUC <sub>0-∞</sub> (h*µg/mL for plasma, h*µg/g for Tissues)  | 18.34         | 10.40        | 43.48        | 67.05           | 49.09         |
| T <sub>1/2</sub> (h)                                         | 0.48          | 3.50         | 3.44         | 4.69            | 3.33          |
| CL/F (L/h/kg)                                                | 5.45          | n/a          | n/a          | n/a             | n/a           |
| Vz/F (L/kg)                                                  | 3.76          | n/a          | n/a          | n/a             | n/a           |

<sup>a</sup> Pharmacokinetic parameters were estimated using noncompartmental analysis of the mean concentration time profiles from two mice.

n/a, not estimated
